# Supplementary material for: Tailbiter: a new amide foldamer
Source: Royal Society of Chemistry journal article supplement (doi:10.1039/b506093a), 2005-01-01
Supplement: b506093a.pdf [file b506093a.pdf]

## Electronic Supplementary Information

### Tailbiter: a new amide foldamer

Christopher A. Hunter,\* Andrea Spitaleri and Salvador Tomas\*

#### Synthesis of **1a**.

0.942 g of acid chloride **3** (4.85 mmol) were dissolved in 90 mL of dry CH<sub>2</sub>Cl<sub>2</sub> and added drop wise over a solution of 2.029 g **2** (1.94 mmol) and 0.384 g of pyridine (4.85 mmol) in 40 mL of dry CH<sub>2</sub>Cl<sub>2</sub>. The reaction was stirred under nitrogen for 16 h. Then the solvent was removed under reduced pressure and the crude was purified by flash chromatography on silica, eluting with a gradient mixture from CH<sub>2</sub>Cl<sub>2</sub>:THF 90:10 v/v to CH<sub>2</sub>Cl<sub>2</sub>:THF:Methanol 90:8:2. Obtained 1.922 g of **1a** as a white solid (75% yield).

<sup>1</sup>H-NMR (CDCl<sub>3</sub>/DMSO-*d*<sub>6</sub> 5:1 v/v): 12.36 (s, 2 H), 9.32 (s, 2H), 9.29 (s, 2H) 8.57 (s, 1H), 8.07 (d, J = 7.2 Hz, 2H), 7.61 (s, 2H), 7.54 (s, 2H), 7.50 (t, J= 7.6, 1H), 7.25 (m, 10H) 6.95 (s, 4H), 6.92 (s, 4H), 5.02 (s, 4H), 3.48 (broad, 8H), 2.31 (broad, 8H), 2.16 (s, 12H), 2.13 (s, 12H) ppm.

HR-MS: Calculated for C<sub>76</sub>H<sub>76</sub>N<sub>10</sub>O<sub>12</sub>: 1321.572244. Found: 1321.574510.

#### Synthesis of **1b**

0.500 g of **1a** (0.38 mmol) were dissolved in 30 mL of dry acetonitrile; over this, 400 µL of trimethylsilyl iodine (TMSI, 1.52 mmol) were added and the solution was stirred under nitrogen for 16 hours. Then, the solvent was removed under reduced pressure, and was re-dissolved in methanol. The methanol was removed under reduced pressure and the solid was triturated in 30 mL of CH<sub>2</sub>Cl<sub>2</sub>. Suspension was filtered of and the solid remnant was dried under vacuum and carried out in the next step without further purification. ). 0.328 g of the intermediate (0.31 mmol) were then dissolved in 10 mL of dry acetonitrile, and added drop wise over 30 mL of dry CH<sub>2</sub>Cl<sub>2</sub> containing 0.71 g of soubilising acid (0.93 mmol), 0.127g of 1-hydroxybenzotriazole hidrate (HOBT, 0.97 mmol), 0.181 g of 1-(3-Dimethylaminopropyl)-3-ethylcarbodiimide hidrochloride (EDC, 0.97 mmol) and 130 mL of Triethylamine (0.97 mmol). The mixture was stirred for 16 hours. Then the solvent was removed under reduced pressure and the crude was purified by flash chromatography on silica, using as eluent a mixture CH<sub>2</sub>Cl<sub>2</sub>:Methanol 98:2 v/v. Obtained 0.200 g of **1b** as a white solid. (25 % yield).

# Supplementary Material (ESI) for Chemical Communications

# This journal is © The Royal Society of Chemistry 2005

<sup>1</sup>H NMR (CDCl<sub>3</sub>/DMSO-*d*<sub>6</sub> 5:1 v/v): 12.00 (s, 2 H), 8.97 (s, 4H), 8.32 (s, 1H), 7.83 (d, J = 7.9 Hz, 2H), 7.36 (dd, J= 3.6 and 1,5 Hz, 2H), 7.29 (t, J = 2.03 Hz, 2H), 7.25 (t, J= 7.9, Hz 1H), 6.69 (s, 4H), 6.66 (s, 4H), 6.22 (s, 4H); 3.61 (m, 12H); 3.45 (broad, 4H), 3.21 (broad, 4H), 2.14 (br, 4H), 2.01 (br, 4H), 1.92 (s, 12H), 1.88 (s, 12H), 1.42 (m, 12H), 1.13 (m, 12H), 0.90 (s, 120H), 0.53 (t, J = 6.6 Hz, 18H) ppm.

MS-MALDI Calculated for C<sub>160</sub>H<sub>244</sub>N<sub>10</sub>O<sub>16</sub> : 2561.9. Found 2562

**Table 1 ESI.** Folding induced changes in chemical shift ( $\Delta\delta$  ppm).

| Proton | $\Delta\delta_{\text{exp}}$ | $\Delta\delta_{\text{calc}}$ | error ( $\Delta\delta_{\text{exp}} - \Delta\delta_{\text{calc}}$ ) |
|--------|-----------------------------|------------------------------|--------------------------------------------------------------------|
| A      | -1.29                       | -1.25                        | -0.04                                                              |
| B      | -2.52                       | -2.58                        | 0.06                                                               |
| C      | 2.92                        | 2.85                         | 0.06                                                               |
| D      | -0.12                       | -0.06                        | -0.06                                                              |
| E      | -0.09                       | 0.00                         | -0.09                                                              |
| H      | -0.05                       | -0.01                        | -0.04                                                              |
| I      | 0.63                        | 0.42                         | 0.21                                                               |
| J      | 0.25                        | 0.10                         | 0.16                                                               |
| K      | 0.07                        | -0.03                        | 0.10                                                               |
| L      | -0.16                       | -0.10                        | -0.06                                                              |
| J'     | 0.31                        | 0.09                         | 0.22                                                               |
| I'     | 0.94                        | 0.92                         | 0.02                                                               |
| H'     | -0.05                       | -0.04                        | -0.01                                                              |
| F'     | 0.01                        | 0.02                         | -0.01                                                              |
| E'     | -0.07                       | -0.04                        | -0.03                                                              |
| D'     | 0.39                        | 0.13                         | 0.26                                                               |
| C'     | 2.51                        | 2.50                         | 0.01                                                               |
| B'     | 0.05                        | 0.09                         | -0.04                                                              |
| A'     | 0.06                        | 0.06                         | 0.00                                                               |
